# Supplementary material
Source: PubMed Central journal article supplement (PMC5621950)
Supplement: supp_5.3.E546_2016-0164-1-at.pdf [file supp_5.3.E546_2016-0164-1-at.pdf]

**Appendix 1 (as supplied by the authors):** Univariate associations between surgical site infection following Caesarean section and potential risk factors

| Potential Risk Factor                                                      | No SSI<br>n (%) | SSI<br>n (%) | Unadjusted OR<br>(95% CI) |
|----------------------------------------------------------------------------|-----------------|--------------|---------------------------|
| <b>Institution-related</b>                                                 |                 |              |                           |
| Number of Caesarean sections in the delivery hospital, per year (n=33,991) |                 |              |                           |
| <130                                                                       | 8364 (98.1)     | 162 (1.9)    | Reference                 |
| 130-949                                                                    | 7107 (96.1)     | 286 (3.9)    | 2.06 (1.69-2.52)          |
| 950-1249                                                                   | 9133 (96.6)     | 321 (3.4)    | 1.81 (1.49-2.20)          |
| ≥1250                                                                      | 8464 (98.2)     | 154 (1.8)    | 0.94 (0.75-1.17)          |
| <b>Area-level</b>                                                          |                 |              |                           |
| Region of maternal residence (n=33,991)                                    |                 |              |                           |
| A                                                                          | 15584 (97.4)    | 424 (2.6)    | Reference                 |
| B                                                                          | 5880 (96.4)     | 217 (3.6)    | 1.35 (1.14-1.60)          |
| C                                                                          | 6135 (97.4)     | 163 (2.6)    | 0.97 (0.81-1.17)          |
| D                                                                          | 5469 (97.9)     | 119 (2.1)    | 0.80 (0.65-0.98)          |
| Quintile of neighbourhood-level income (n=33,267)                          |                 |              |                           |
| 1 (lowest)                                                                 | 6441 (96.1)     | 262 (3.9)    | 1.68 (1.44-1.97)          |
| 2                                                                          | 5842 (97.1)     | 173 (2.9)    | 1.24 (1.04-1.48)          |
| 3-5                                                                        | 20070 (97.7)    | 479 (2.3)    | Reference                 |
| Maternal residence (n=33,971)                                              |                 |              |                           |
| Urban                                                                      | 22978 (97.2)    | 655 (2.8)    | Reference                 |
| Rural                                                                      | 10071 (97.4)    | 267 (2.6)    | 0.93 (0.81-1.08)          |
| <b>Maternal Demographics</b>                                               |                 |              |                           |
| Maternal age, years (n=33,991)                                             |                 |              |                           |
| <25                                                                        | 6077 (96.4)     | 228 (3.6)    | 1.48 (1.26-1.73)          |
| 25-34                                                                      | 20392 (97.5)    | 516 (2.5)    | Reference                 |
| ≥35                                                                        | 6599 (97.4)     | 179 (2.6)    | 1.07 (0.90-1.27)          |
| Pre-pregnancy weight, kg (n=33,991)                                        |                 |              |                           |
| <53                                                                        | 2680 (97.7)     | 63 (2.3)     | 1.16 (0.87-1.55)          |
| 53-66.9                                                                    | 9787 (98.0)     | 199 (2.0)    | Reference                 |
| 67-76.9                                                                    | 5553 (97.6)     | 136 (2.4)    | 1.21 (0.97-1.50)          |
| 77-86.9                                                                    | 3976 (97.4)     | 108 (2.6)    | 1.33 (1.05-1.69)          |
| 87-97.9                                                                    | 2548 (96.7)     | 86 (3.3)     | 1.66 (1.28-2.14)          |
| ≥98                                                                        | 3043 (94.2)     | 187 (5.8)    | 3.00 (2.44-3.68)          |
| Missing                                                                    | 5481 (97.4)     | 144 (2.6)    | 1.29 (1.04-1.61)          |
| Marital status (n=33,991)                                                  |                 |              |                           |
| Married/common-law                                                         | 24102 (97.6)    | 587 (2.4)    | Reference                 |
| Single/divorced/separated/widowed                                          | 7286 (96.2)     | 287 (3.8)    | 1.61 (1.40-1.86)          |
| Missing                                                                    | 1680 (97.2)     | 49 (2.8)     | 1.19 (0.88-1.60)          |
| Smoking during pregnancy (n=33,708)                                        |                 |              |                           |
| No                                                                         | 25820 (97.5)    | 651 (2.5)    | Reference                 |
| Yes                                                                        | 6973 (96.4)     | 264 (3.6)    | 1.50 (1.30-1.74)          |
| Alcohol or drug abuse during pregnancy (n=33,991)                          |                 |              |                           |

| Potential Risk Factor                                                       | No SSI<br>n (%) | SSI<br>n (%) | Unadjusted OR<br>(95% CI) |
|-----------------------------------------------------------------------------|-----------------|--------------|---------------------------|
| No                                                                          | 32621 (97.3)    | 897 (2.7)    | Reference                 |
| Yes                                                                         | 447 (94.5)      | 26 (5.5)     | 2.11 (1.41-3.15)          |
| <b>Maternal medical conditions</b>                                          |                 |              |                           |
| Non-obstetric pre-existing health conditions affecting pregnancy (n=33,991) |                 |              |                           |
| No                                                                          | 26761 (97.5)    | 681 (2.5)    | Reference                 |
| Yes                                                                         | 6307 (96.3)     | 242 (3.7)    | 1.49 (1.28-1.73)          |
| Hypertension (n=33,991)                                                     |                 |              |                           |
| No                                                                          | 28719 (97.5)    | 738 (2.5)    | Reference                 |
| Pre-existing                                                                | 515 (95.7)      | 23 (4.3)     | 1.75 (1.14-2.67)          |
| Gestational or unspecified                                                  | 2605 (95.9)     | 110 (4.1)    | 1.65 (1.34-2.02)          |
| Preeclampsia                                                                | 1229 (95.9)     | 52 (4.1)     | 1.66 (1.24-2.20)          |
| Diabetes (n=33,991)                                                         |                 |              |                           |
| No                                                                          | 30955 (97.4)    | 819 (2.6)    | Reference                 |
| Pre-existing                                                                | 203 (94.9)      | 11 (5.1)     | 2.04 (1.10-2.76)          |
| Gestational                                                                 | 1910 (95.4)     | 93 (4.6)     | 1.83 (1.46-2.28)          |
| Anemia during pregnancy (n=33,991)                                          |                 |              |                           |
| No                                                                          | 30551 (97.3)    | 837 (2.7)    | Reference                 |
| Yes                                                                         | 2517 (96.7)     | 86 (3.3)     | 1.24 (0.99-1.56)          |
| Depression during pregnancy (n=33,991)                                      |                 |              |                           |
| No                                                                          | 31592 (97.3)    | 866 (2.7)    | Reference                 |
| Yes                                                                         | 1476 (96.3)     | 57 (3.7)     | 1.38 (1.05-1.82)          |
| Anticoagulation therapy during pregnancy (n=33,991)                         |                 |              |                           |
| No                                                                          | 32774 (97.3)    | 900 (2.7)    | Reference                 |
| Yes                                                                         | 294 (92.7)      | 23 (7.3)     | 2.82 (1.84-4.35)          |
| Maternal influenza vaccination during pregnancy (n=33,991)                  |                 |              |                           |
| No                                                                          | 32105 (97.3)    | 901 (2.7)    | Reference                 |
| Yes                                                                         | 963 (97.8)      | 22 (2.2)     | 1.22 (0.80-1.87)          |
| <b>Pregnancy history</b>                                                    |                 |              |                           |
| Parity (n=33,991)                                                           |                 |              |                           |
| Primiparous                                                                 | 16268 (96.8)    | 545 (3.2)    | Reference                 |
| Multiparous                                                                 | 16800 (97.8)    | 378 (2.2)    | 0.66 (0.58-0.76)          |
| Mode of delivery in last pregnancy (n=33,991)                               |                 |              |                           |
| Not applicable                                                              | 18188 (96.9)    | 589 (3.1)    | Reference                 |
| Vaginal                                                                     | 4187 (97.4)     | 111 (2.6)    | 0.81 (0.66-1.00)          |
| Caesarean section                                                           | 10693 (98.0)    | 223 (2.0)    | 0.63 (0.54-0.74)          |
| Number of previous Caesarean sections (n=33,991)                            |                 |              |                           |
| None                                                                        | 20748 (96.9)    | 663 (3.1)    | Reference                 |
| One                                                                         | 9695 (98.0)     | 199 (2.0)    | 0.64 (0.55-0.75)          |
| Two or more                                                                 | 2625 (97.7)     | 61 (2.3)     | 0.70 (0.54-0.92)          |
| SSI after previous Caesarean section(n=33,991)                              |                 |              |                           |
| No                                                                          | 32731 (97.3)    | 908 (2.7)    | Reference                 |
| Yes                                                                         | 337 (95.7)      | 15 (4.3)     | 0.72 (0.34-1.55)          |
| <b>Pregnancy characteristics</b>                                            |                 |              |                           |

| Potential Risk Factor                                                                    | No SSI<br>n (%) | SSI<br>n (%) | Unadjusted OR<br>(95% CI) |
|------------------------------------------------------------------------------------------|-----------------|--------------|---------------------------|
| <b>Weight gain during pregnancy, kg (n=33,991)</b>                                       |                 |              |                           |
| <10                                                                                      | 5493 (97.2)     | 158 (2.8)    | 1.11 (0.92-1.34)          |
| 10-19.9                                                                                  | 13875 (97.5)    | 356 (2.5)    | Reference                 |
| 20-29.9                                                                                  | 4480 (96.9)     | 142 (3.1)    | 1.24 (1.02-1.51)          |
| ≥30                                                                                      | 615 (94.2)      | 38 (5.8)     | 2.37 (1.68-3.35)          |
| Missing                                                                                  | 8605 (97.4)     | 229 (2.6)    | 1.03 (0.87-1.22)          |
| <b>Chorioamnionitis during pregnancy (n=33,991)</b>                                      |                 |              |                           |
| No                                                                                       | 32383 (97.4)    | 867 (2.6)    | Reference                 |
| Yes                                                                                      | 685 (92.4)      | 56 (7.6)     | 3.08 (2.33-4.07)          |
| <b>Diagnostic and/or therapeutic procedure(s) performed on mother (n=33,991)</b>         |                 |              |                           |
| No                                                                                       | 32112 (97.3)    | 885 (2.7)    | Reference                 |
| Yes                                                                                      | 956 (96.2)      | 38 (3.8)     | 1.43 (1.03-1.99)          |
| <b>Steroid use ≥48 hrs before delivery for fetal lung maturity (n=33,991)</b>            |                 |              |                           |
| None                                                                                     | 31919 (97.3)    | 873 (2.7)    | Reference                 |
| Yes                                                                                      | 1149 (95.8)     | 50 (4.2)     | 1.58 (1.18-2.11)          |
| <b>Cervical dilation in the last examination before Caesarean section, cm (n=33,130)</b> |                 |              |                           |
| None                                                                                     | 16758 (98.0)    | 346 (2.0)    | Reference                 |
| 1-3                                                                                      | 3371 (96.8)     | 113 (3.2)    | 1.63 (1.31-2.02)          |
| 4-10                                                                                     | 12104 (96.5)    | 438 (3.5)    | 1.77 (1.53-2.04)          |
| <b>Time between rupture of membranes to delivery, hrs (n=33,690)</b>                     |                 |              |                           |
| <1                                                                                       | 16501 (97.8)    | 370 (2.2)    | Reference                 |
| 2-11                                                                                     | 8044 (96.9)     | 254 (3.1)    | 1.42 (1.21-1.67)          |
| ≥12                                                                                      | 8228 (96.6)     | 293 (3.4)    | 1.60 (1.37-1.87)          |
| <b>Stage of labour before Caesarean section (n=33,990)</b>                               |                 |              |                           |
| None                                                                                     | 16225 (98.0)    | 339 (2.0)    | Reference                 |
| First                                                                                    | 10478 (96.7)    | 354 (3.3)    | 1.62 (1.40-1.89)          |
| Second                                                                                   | 6364 (96.5)     | 230 (3.5)    | 1.74 (1.47-2.07)          |
| <b>Spontaneous rupture of membranes (n=33,646)</b>                                       |                 |              |                           |
| Yes                                                                                      | 9116 (97.0)     | 286 (3.0)    | Reference                 |
| No                                                                                       | 23614 (97.4)    | 630 (2.6)    | 0.85 (0.73-0.97)          |
| <b>Delivery</b>                                                                          |                 |              |                           |
| <b>Length of antepartum stay, hrs (n=33,969)</b>                                         |                 |              |                           |
| <24                                                                                      | 27786 (97.5)    | 722 (2.5)    | Reference                 |
| 24-49                                                                                    | 3029 (96.8)     | 99 (3.2)     | 1.26 (1.02-1.56)          |
| ≥50                                                                                      | 2231 (95.6)     | 102 (4.4)    | 1.76 (1.42-2.17)          |
| <b>Year of delivery (n=33,991)</b>                                                       |                 |              |                           |
| 1997-2000                                                                                | 7045 (95.3)     | 346 (4.7)    | 2.22 (1.86-2.66)          |
| 2001-2004                                                                                | 8672 (97.8)     | 192 (2.2)    | 1.01 (0.82-1.23)          |
| 2005-2008                                                                                | 8806 (97.8)     | 194 (2.2)    | 0.99 (0.81-1.21)          |
| 2009-2012                                                                                | 8545 (97.8)     | 191 (2.2)    | Reference                 |
| <b>Delivering on a weekend (n=33,991)</b>                                                |                 |              |                           |
| No                                                                                       | 27441 (97.4)    | 741 (2.6)    | Reference                 |
| Yes                                                                                      | 5627 (96.9)     | 182 (3.1)    | 1.20 (1.02-1.41)          |

| Potential Risk Factor                                                 | No SSI<br>n (%) | SSI<br>n (%) | Unadjusted OR<br>(95% CI) |
|-----------------------------------------------------------------------|-----------------|--------------|---------------------------|
| <b>Primary indication for Caesarean section (n=33,991)</b>            |                 |              |                           |
| Breech                                                                | 4471 (97.6)     | 109 (2.4)    | 1.28 (1.01-1.63)          |
| Dystocia                                                              | 8602 (96.5)     | 311 (3.5)    | 1.91 (1.59-2.29)          |
| Fetal distress                                                        | 5066 (96.6)     | 176 (3.4)    | 1.83 (1.49-2.26)          |
| Other                                                                 | 5120 (97.4)     | 139 (2.6)    | 1.42 (1.14-1.78)          |
| Previous Caesarean section                                            | 9809 (98.1)     | 188 (1.9)    | Reference                 |
| <b>Regional anesthesia during labour or delivery (n=33,991)</b>       |                 |              |                           |
| No                                                                    | 2100 (96.8)     | 70 (3.2)     | Reference                 |
| Yes                                                                   | 30968 (97.3)    | 853 (2.7)    | 0.83 (0.65-1.07)          |
| <b>Antibiotic therapy during labour and delivery (n=33,991)</b>       |                 |              |                           |
| Yes                                                                   | 20909 (97.6)    | 510 (2.4)    | Reference                 |
| No                                                                    | 12159 (96.7)    | 413 (3.3)    | 1.39 (1.22-1.59)          |
| <b>Maternal blood transfusion (n=33,991)</b>                          |                 |              |                           |
| No                                                                    | 32749 (97.3)    | 896 (2.7)    | Reference                 |
| Yes                                                                   | 319 (92.2)      | 27 (7.8)     | 3.08 (2.07-4.59)          |
| <b>Season of delivery (n=33,991)</b>                                  |                 |              |                           |
| December-February                                                     | 7474 (97.4)     | 201 (2.6)    | 0.95 (0.78-1.14)          |
| March-May                                                             | 8525 (97.3)     | 238 (2.7)    | 0.99 (0.82-1.18)          |
| June-August                                                           | 8659 (97.2)     | 246 (2.8)    | Reference                 |
| September-November                                                    | 8410 (97.3)     | 238 (2.8)    | 1.00 (0.83-1.19)          |
| <b>Type of Caesarean section (n=33,991)</b>                           |                 |              |                           |
| Low segment transverse                                                | 32338 (97.3)    | 902 (2.7)    | Reference                 |
| Other                                                                 | 730 (97.2)      | 21 (2.8)     | 1.04 (0.68-1.62)          |
| <b>Instrumentation used during Caesarean section (n=33,991)</b>       |                 |              |                           |
| No                                                                    | 30492 (97.3)    | 843 (2.7)    | Reference                 |
| Forceps or vacuum                                                     | 2576 (97.0)     | 80 (3.0)     | 1.12 (0.88-1.41)          |
| <b>General anesthesia during labour or delivery (n=33,991)</b>        |                 |              |                           |
| No                                                                    | 30301 (97.4)    | 821 (2.6)    | Reference                 |
| Yes                                                                   | 2767 (96.4)     | 102 (3.6)    | 1.35 (1.09-1.67)          |
| <b>Other procedures performed during Caesarean section (n=33,991)</b> |                 |              |                           |
| No                                                                    | 26875 (97.3)    | 756 (2.7)    | Reference                 |
| Yes                                                                   | 6193 (97.4)     | 167 (2.6)    | 0.95 (0.80-1.13)          |
| <b>Fetal and neonatal</b>                                             |                 |              |                           |
| <b>Infant birth weight, g (n=33,967)</b>                              |                 |              |                           |
| <2,500                                                                | 2235 (96.9)     | 72 (3.1)     | 1.20 (0.94-1.54)          |
| 2500-3900                                                             | 29186 (97.4)    | 779 (2.6)    | Reference                 |
| ≥4000                                                                 | 1626 (95.9)     | 69 (4.1)     | 1.58 (1.22-2.03)          |
| <b>Apgar score at 5 minutes (n=33,794)</b>                            |                 |              |                           |
| 0-6                                                                   | 619 (94.9)      | 33 (5.1)     | Reference                 |
| 7-10                                                                  | 32256 (97.3)    | 886 (2.7)    | 1.94 (1.36-2.77)          |
| <b>Gestational age, weeks (n=33,873)</b>                              |                 |              |                           |
| <37                                                                   | 3195 (96.4)     | 121 (3.6)    | 1.59 (1.29-1.95)          |
| 37-39 <sup>+6</sup>                                                   | 18900 (97.7)    | 450 (2.3)    | Reference                 |

| Potential Risk Factor                                                    | No SSI<br>n (%) | SSI<br>n (%) | Unadjusted OR<br>(95% CI) |
|--------------------------------------------------------------------------|-----------------|--------------|---------------------------|
| ≥40                                                                      | 10858 (96.9)    | 349 (3.1)    | 1.35 (1.18-1.56)          |
| Breastfeeding at discharge (n=33,677)                                    |                 |              |                           |
| Yes                                                                      | 23129 (97.6)    | 572 (2.4)    | Reference                 |
| No                                                                       | 9645 (96.7)     | 331 (3.3)    | 1.37 (1.20-1.58)          |
| Presentation at delivery (n=33,991)                                      |                 |              |                           |
| Other                                                                    | 8906 (97.2)     | 260 (2.8)    | 1.08 (0.93-1.25)          |
| Vertex                                                                   | 22243 (97.4)    | 601 (2.6)    | Reference                 |
| Missing                                                                  | 1919 (96.9)     | 62 (3.1)     | 1.19 (0.91-1.55)          |
| Number of fetuses (n=33,991)                                             |                 |              |                           |
| Singleton                                                                | 31992 (97.3)    | 884 (2.7)    | Reference                 |
| Multiples                                                                | 1076 (96.5)     | 39 (3.5)     | 1.30 (0.94-1.80)          |
| Diagnostic and/or therapeutic procedure(s) performed on fetus (n=33,991) |                 |              |                           |
| No                                                                       | 31702 (97.3)    | 883 (2.7)    | Reference                 |
| Yes                                                                      | 1366 (97.2)     | 40 (2.8)     | 1.05 (0.76-1.45)          |

Note: CI=confidence interval, OR=odds ratio, SSI=surgical site infection
