# Supplementary material
Source: PubMed Central journal article supplement (PMC5621950)
Supplement: supp_5.3.E546_Original_submission_2016-0164.pdf [file supp_5.3.E546_Original_submission_2016-0164.pdf]

1  
2  
3 Title: Risk factors for surgical site infection following Caesarean section: a retrospective cohort  
4 study  
5

6  
7 Ketcheson, Felicia, MSc<sup>1</sup>; Woolcott, Christy, PhD<sup>2,3</sup>; Allen, Victoria, MD, FRCPC<sup>1,3</sup>; Langley,  
8 Joanne M., MD, FRCPC<sup>1,2,4\*</sup>  
9

10 1 Department of Community Health and Epidemiology, Dalhousie University, Halifax, Nova  
11 Scotia, Canada

12 2 Department of Pediatrics, Dalhousie University, Halifax, Nova Scotia, Canada

13 3 Department of Obstetrics & Gynaecology, Dalhousie University, Halifax, Nova Scotia, Canada

14 4 Canadian Centre for Vaccinology, IWK Health Centre, Halifax, Nova Scotia, Canada  
15  
16  
17

18  
19 \*Corresponding author: joanne.langley@dal.ca  
20  
21

## 22 Funding

23  
24 This study was supported by a Category A Grant from the IWK Health Centre and a student  
25 stipend provided to FK through a Nova Scotia Support Grant provided by the Nova Scotia  
26 Health Research Foundation.  
27  
28  
29  
30  
31  
32

33  
34  
35 Declaration of competing interests: None  
36  
37  
38  
39

40 Keywords: obstetrics, surgical site infection, Caesarean section, healthcare associated infection,  
41 risk factors, retrospective cohort  
42  
43  
44  
45  
46  
47  
48  
49  
50  
51  
52  
53  
54  
55  
56  
57  
58  
59  
60

1  
2  
3 Abstract  
4

5 Background: The rate of Caesarean section (C/S) is increasing in North America. Surgical site  
6 infection (SSI) following C/S can make it difficult to recover from surgery, care for a baby and  
7 return home. We aimed to determine the incidence of post-C/S SSI to 30 days, risk factors, and if  
8 risk factors differed for pre- versus post-discharge SSI.  
9

10 Methods: A retrospective cohort was created by linking a provincial perinatal database to  
11 hospital admissions and physician billings databases to follow women delivering via C/S for 30  
12 days post operatively for SSI. Women with a provincial health card who delivered a baby  $\geq 500$  g  
13 and  $\geq 20$  weeks' gestational age from 1997-2012 were eligible. Logistic regression with  
14 generalized estimating equations was used to determine risk factors.  
15

16 Results: 33,991 C/Ss occurred in 25,123 women. The SSI rate of 2.72% (95% CI 2.54%-2.89%)  
17 decreased over the study period. Independent risk factors for SSI with adjusted odds ratios  $\geq 1.5$   
18 were pre-pregnancy weight  $\geq 87$  kg, gaining  $\geq 30$  kg, chorioamnionitis, maternal blood  
19 transfusion, anticoagulation therapy, alcohol or drug abuse, labour onset before C/S, delivering  
20 in 1997-2000 and delivering in a hospital performing 130-949 C/Ss per year. Multiple gestations,  
21 smoking, C/S during first stage of labour, delivering earlier in the study period and in a hospital  
22 with 130-1249 C/S deliveries per year significantly differed between pre- versus post-discharge  
23 SSI.  
24

25 Interpretation: Most risk factors are known pre-delivery and some are potentially modifiable.  
26

27 While the rate of SSI has decreased, the rate of C/Ss warrants attention to preventive  
28 interventions to reduce the burden of illness associated with SSI.  
29  
30  
31  
32  
33  
34  
35  
36  
37  
38  
39  
40  
41  
42  
43  
44  
45  
46  
47  
48  
49  
50  
51  
52  
53  
54  
55  
56  
57  
58  
59  
60

## Introduction

The percentage of pregnancies delivered by Caesarean section (C/S) has been increasing in North America. In Canada, the C/S rate was 20% in 1988 (1) and rose to 26% in 2012 (2). Surgical site infection (SSI) following C/S can adversely influence the post-partum period for mother and newborn, making it difficult to recover from surgery, care for a baby, and return home. Although Canada has no national surveillance for SSI following C/S, the U.S. National Healthcare Safety Network follows this healthcare associated infection and reported a mean SSI rate of 1.84% for the period 2006-2008 (3). An Australian study of 81 healthcare facilities from 2002-2013 found a similar rate of 2.05% (95% confidence interval [CI] 1.93%-2.18%) which decreased over the study period (4). Some hospitals conduct surveillance on C/S-SSI up until discharge and others conduct post-discharge surveillance as well. The rate of SSI until hospital discharge following C/S varies, ranging from 1.9% to 11.2% according to a review of studies from 1990-2007 (5). Rates of SSI are higher if post-discharge surveillance is conducted, but most infection prevention and control programs do not have the resources to perform this surveillance.

Risk factors for SSI following C/S have been identified in the literature. Most studies have found a significant association between obesity and risk for SSI (6,7) and further, a dose-response relationship between body mass index (BMI) and risk for SSI has been noted (8). Conversely, findings for other risk factors, such as hypertension and diabetes, have been less consistent between studies (8-10). Appropriately timed antibiotic prophylaxis (11) and chlorhexidine antiseptic skin preparation (12) have both been shown to decrease the risk of postoperative SSI.

In the current study, a population-based cohort in one province of Canada was followed from the perinatal period to 30 days after surgery to determine 1) the incidence of SSI to 30 days

1  
2  
3 postpartum and the percentage of infections presenting prior to or after discharge from the  
4  
5 delivery hospital admission, 2) risk factors associated with the development of SSI, and 3)  
6  
7  
8 whether risk factors differ with time of presentation.  
9  
10  
11  
12  
13  
14  
15  
16  
17  
18  
19  
20  
21  
22  
23  
24  
25  
26  
27  
28  
29  
30  
31  
32  
33  
34  
35  
36  
37  
38  
39  
40  
41  
42  
43  
44  
45  
46  
47  
48  
49  
50  
51  
52  
53  
54  
55  
56  
57  
58  
59  
60

Confidential

## Methods

### Study setting

This study took place in Nova Scotia (population ~950,000), which in 2011 had 8,860 births and a C/S rate of 26.6% (13). Approximately half of deliveries are performed at the regional and tertiary care centre based in the capital city (IWK Health Centre, Halifax). This study was approved by the Reproductive Care Program's Joint Data Access Committee, Health Data Nova Scotia, and the IWK Health Centre's Research Ethics Board (project number 1019575).

### Study participants

Women with a Nova Scotia health card who gave birth via C/S in the province between January 1, 1997 and December 31, 2012 were eligible. Women were excluded if they delivered a baby weighing less than 500 g or less than 20 weeks' gestational age.

### Study design and data sources

The retrospective cohort was created using the Nova Scotia Atlee Perinatal Database (NSAPD), a provincial database administered by the Reproductive Care Program of Nova Scotia. It contains information on all pregnancies and deliveries in Nova Scotia, which is collected by healthcare professionals using standardized forms. From the NSAPD, we obtained relevant information on pregnancy, labour, delivery, and the postpartum period, including SSI identified pre-discharge.

### Study outcome

The NSAPD was linked with the Canadian Institute for Health Information's Discharge Abstract Database (DAD) to capture SSI diagnosed during any hospitalization, and with the Nova Scotia Medical Services Insurance Billings (MSI) Physician Billings database to capture

1  
2  
3 post-discharge SSIs that were treated in a physician's office. The DAD used the International  
4  
5 Classification of Diseases, edition 9 (ICD-9) until 2000 and the Canadian Enhancement of  
6  
7 edition 10 (ICD-10-CA) from 2001 onward, and MSI used ICD-9 diagnostic codes. The outcome  
8  
9 was SSI following C/S within 30 days of surgery. Any woman with a diagnostic code for  
10  
11 surgical wound infection or endometritis according to any of the coding systems: the NSAPD,  
12  
13 ICD-10-CA (N71.0, N71.9, N73.0, O86.0xx); or ICD-9 (614.3, 674.30, 674.32, 674.34, 998.51,  
14  
15 or 998.59) was considered to have been diagnosed with a SSI. SSIs were categorized according  
16  
17 to whether the diagnosis occurred during the hospitalization for delivery of the infant ("pre-  
18  
19 discharge"), or the diagnosis occurred after being discharged to the community in a subsequent  
20  
21 hospital admission or in a physician's office ("post-discharge"). The timing of pre-discharge SSI  
22  
23 could not be defined as only admission and discharge dates are recorded. For SSI identified post-  
24  
25 discharge, we estimated the number of days from C/S to identification of SSI based on the date  
26  
27 of either hospital re-admission or physician visit.

#### 33 34 Potential risk factors

35  
36 A number of potential risk factors for SSI were examined (see Table 1). The NSAPD has  
37  
38 information on smoking at various times (i.e. at first prenatal visit, 20 weeks, and delivery) from  
39  
40 which was determined whether the woman smoked. Height was not recorded in the NSAPD until  
41  
42 2003 and, therefore, standard BMI categories (14) were approximated using weight cut points  
43  
44 determined using receiver operator characteristic curve analysis: <53 kg as underweight, 53-<67  
45  
46 kg as normal weight, 67-<77 kg as overweight, 77-<87 as obese I, 87-<98 as obese II, and ≥98 as  
47  
48 obese III. In supplementary analyses of deliveries from 2003 on, we examined BMI (<18.5, 18.5-  
49  
50 <25, 25-<30, 30-<40, and ≥40 kg/m<sup>2</sup>) for comparison. Hypertension, diabetes, and depression  
51  
52  
53  
54  
55  
56  
57  
58  
59  
60

1  
2  
3 variables were all combinations of both diagnostic codes and codes indicating the mother was  
4  
5 taking medication for these medical conditions from the NSAPD.  
6  
7

#### 8 Statistical analysis 9

10 The unit of analysis was deliveries by C/S rather than women. Descriptive statistics were  
11  
12 used to estimate the incidence of pre-discharge, post-discharge, and total SSI to 30 days with  
13  
14 exact CIs. Chi-square tests were used to determine which risk factors were significantly  
15  
16 associated with SSI. Risk factors associated with SSI at  $p < 0.10$  were entered into a multiple  
17  
18 logistic regression model from which risk factors that were not independently associated with  
19  
20 SSI were removed using backward stepwise selection. Only risk factors that were associated with  
21  
22 SSI at  $p < 0.05$  were retained. From the logistic models, odds ratios (OR) with 95% CIs were  
23  
24 estimated. Risk factors for pre- and post-discharge SSI were examined using multinomial logistic  
25  
26 regression. Generalized estimating equations were used for all logistic models to account for  
27  
28 potential correlation between women who had more than one C/S over the study period. For risk  
29  
30 factors with  $\geq 5\%$  missing, a missing category was created, but women with missing values for  
31  
32 risk factors with  $< 5\%$  missing overall were excluded from regression analyses (since a missing  
33  
34 value category would have low numbers). All analyses were conducted using STATA SE 13  
35  
36  
37  
38  
39  
40  
41 (StataCorp LP, College Station, Texas).  
42  
43  
44  
45  
46  
47  
48  
49  
50  
51  
52  
53  
54  
55  
56  
57  
58  
59  
60

## Results

Over the 16-year study period, 25123 women (with 33991 C/S) were identified from the NSAPD and could be linked to hospital and physician billings data (>96% linkage). A total of 923 SSIs followed these 33991 C/S deliveries within 30 days, giving a rate of 2.72% (95% CI 2.54%-2.89%). There were 15 women who had more than one SSI during this period. The rate decreased from 5.2% in 1997 to 2.0% in 2012 (Figure 1). The post-discharge SSI rate of 1.59% (95% CI 1.45%-1.72%) was higher than the pre-discharge rate of 1.13% (95% CI 1.02%-1.24%) ( $p<0.001$ ). Of the post-discharge SSIs, 370 (68.6%) were identified in hospital readmissions. Nearly 85% of women who first presented with SSI post-discharge did so within two weeks of their C/S. The mean length of postpartum stay decreased from 3.86 days (SD=1.53) in 1997-2000 to 3.23 days (SD=1.04) in 2009-2012 ( $p<0.001$ ). Administration of antibiotic therapy for either prophylaxis or treatment during labour and delivery increased from 46.9% in 1997-2000 to 73.6% in 2009-2012. From 2003-2012, we were able to determine that in only 8.2% of women receiving antibiotics was the indication for Group B Streptococcus.

Table 2 shows the risk factors that were independently associated with the odds of developing SSI within 30 days following C/S at  $p<0.05$  (see Appendix 1 for univariate associations of all potential risk factors with SSI). Women who gave birth in 1997-2000 had the highest risk of presenting with SSI (OR 2.23; 95% CI 1.81-2.75), relative to those delivering between 2009-2012. Compared to women who were primiparous, women who were multiparous had a lower risk of SSI (OR 0.78; 95% CI 0.67-0.92). A dose-response relationship was observed between pre-pregnancy weight and SSI with women weighing at least 98 kg having more than three times the odds of SSI than women weighing less than 53 kg. In supplementary analyses conducted for the period 2003-2012, BMI was similarly associated with SSI (data not shown).



1  
2  
3 The results of the multinomial logistic regression analysis comparing the risk factors for  
4 pre-discharge SSI and post-discharge SSI are found in Table 3. Women who smoked during  
5 pregnancy and women who had C/S in the first stage of labour had significantly higher odds of  
6 presenting with SSI post-discharge than pre-discharge. Deliveries that were earlier in the study  
7 period, of multiple gestations, and in a hospital that performed 130-1249 C/Ss per year had  
8 significantly higher odds of an SSI presenting pre-discharge than post-discharge.  
9  
10  
11  
12  
13  
14  
15  
16  
17  
18  
19  
20  
21  
22  
23  
24  
25  
26  
27  
28  
29  
30  
31  
32  
33  
34  
35  
36  
37  
38  
39  
40  
41  
42  
43  
44  
45  
46  
47  
48  
49  
50  
51  
52  
53  
54  
55  
56  
57  
58  
59  
60

Confidential

## Interpretation

In this 16-year study of nearly 34000 deliveries by C/S, the incidence of SSI to 30 days was 2.72% (95% CI 2.54%-2.89%). More SSIs presented post-discharge than pre-discharge (58.4% vs. 41.6%, respectively). Many of the risk factors identified for SSI are modifiable or known before delivery including pre-pregnancy weight and anticoagulation therapy. Some risk factors were associated differently with pre- vs. post-discharge SSI .

The incidence of SSI of 2.72% observed in the present study is comparable to the lower end of the range of 1.9%-11.2% found in a review (5). A Nova Scotian study reported the SSI rate from 1988-2002 to be 1.50%; however, the study only assessed SSI to discharge (15). The higher rate of SSI found by following women for 30 days suggests that using solely pre-discharge surveillance will underestimate the frequency of SSI. Since post-discharge surveillance is expensive, analysis of databases, as in this study, can be a feasible method to evaluate if rates are changing over time. Variation in reported SSI rates can often be attributed to different populations, time periods, SSI definitions, secular trends, and improvements in healthcare (16). The decrease in our SSI rate over a 16-year period is similar to a decreased rate of 2.05% in an Australian study (4). Possible reasons for a decrease in the SSI rate include increased administration of appropriate prophylactic antibiotics and the use of 2% chlorhexidine skin antisepsis.

We noted a number of risk factors for SSI, including higher pre-pregnancy weight and weight gain during pregnancy. A dose-response relationship was observed between pre-pregnancy weight (and BMI) and SSI, with weighing  $\geq 98$  kg (approximating obese class III) being associated with over three times the odds of SSI (OR 3.56; 95% CI 2.85-4.45), compared to weighing  $\geq 53$  to 66.9 kg (approximating normal weight). Pre-pregnancy obesity has been a

1  
2  
3 significant independent risk factor for SSI in most studies (6,7) and is therefore important given  
4  
5 its large OR, high prevalence (estimated at 35% in the present study), and consistency of  
6  
7 association among studies. Many other risk factors found that are theoretically modifiable  
8  
9 included smoking, alcohol or drug abuse, gaining  $\geq 30$  kg, and no antibiotic prophylaxis,  
10  
11 suggesting the odds of developing SSI may decrease if these risk factors are reduced or  
12  
13 eliminated. A targeted clinical and infection prevention and control approach could decrease the  
14  
15 SSI rate and lower the burden of SSI following C/S on patients and the healthcare system.  
16  
17  
18

19  
20 This study is novel in its analysis comparing pre- and post-discharge risk factors for C/S-  
21  
22 SSI. Though many risk factors were similarly associated, there were some significant  
23  
24 differences between pre- and post-discharge risk factors. Many risk factors associated with pre-  
25  
26 discharge SSI may be linked to an increased potential for contamination during surgery (e.g. not  
27  
28 receiving antibiotic therapy) and longer surgery duration (e.g. obesity and multiple gestations).  
29  
30 In contrast, risk factors associated with post-discharge SSI may be indicative of increased  
31  
32 potential for wound contamination (e.g. smoking and low socioeconomic status) and delayed  
33  
34 wound healing or wound separation (e.g. obesity). These results suggest that the effect of some  
35  
36 individual risk factors is influenced by the length of time since surgery. A previous study of  
37  
38 different surgeries, excluding C/S, also found a significant difference between risk factors for  
39  
40 pre- and post-discharge SSI, including age and duration of surgery (17). More studies are  
41  
42 necessary to see if these findings are observed in other populations, and to separate the influence  
43  
44 of location (hospital versus home) from that of time since surgery.  
45  
46  
47  
48  
49

#### 50 Limitations

51  
52 An administrative database was used to capture SSI, which leads to the potential for  
53  
54 misclassification; however, the use of administrative data for post-C/S SSI has been validated in  
55  
56  
57  
58  
59  
60

1  
2  
3 the literature. A Canadian study found that the sensitivity for detection of SSI after C/S was  
4  
5 16.7% when using hospital data and increased to 77.3% when including emergency room and  
6  
7 physician administrative data (18). Similarly, a review of validation studies for SSI following  
8  
9 any surgery found a pooled sensitivity for non-orthopedic surgeries to be 76.7% (95% CI 46.3%-  
10  
11 92.6%) (19). As such, the risk for misclassification is low. Some risk factors were unavailable  
12  
13 for the entire study period (e.g. maternal height) or had a high percentage of missing values.  
14  
15 Finally, the NSAPD does not contain surgical information (e.g. length of surgery) so were unable  
16  
17 to be included as potential risk factors for SSI.  
18  
19  
20

## 21 22 Conclusion

23  
24 Findings are generalizable to populations with similar healthcare systems and  
25  
26 demographic and clinical factors as Nova Scotia. Knowing which risk factors are associated  
27  
28 with pre- versus post-discharge SSI can assist clinicians in identifying women with specific risk  
29  
30 factor profiles who may be at risk for SSI. This offers an opportunity to develop systematic  
31  
32 approaches to remove or reduce risk factors through patient, public and healthcare provider  
33  
34 education, and system approaches such as timely administration of appropriate antibiotics.  
35  
36  
37  
38  
39  
40  
41  
42  
43  
44  
45  
46  
47  
48  
49  
50  
51  
52  
53  
54  
55  
56  
57  
58  
59  
60

## Acknowledgements

The authors wish to thank The Reproductive Care Program of Nova Scotia and Health Data Nova Scotia for the use of their data. Portions of the data were made available by Health Data Nova Scotia of Dalhousie University. Although part of this research is based on data obtained from the Nova Scotia Department of Health and Wellness, the observations and opinions expressed are those of the authors and do not represent those of either Health Data Nova Scotia or the Department of Health and Wellness.

Part of this research was completed for a thesis to fulfill a portion of Felicia Ketcheson's degree requirements for a MSc in Community Health & Epidemiology, Dalhousie University.

This research has been previously presented at the 2016 Infection Prevention and Control Canada Conference, May 15-18, 2016, Niagara Falls, ON.

## References

- 1  
2  
3  
4  
5  
6  
7 (1) The Reproductive Care Program of Nova Scotia. Best Practices in the Use of Cesarean  
8 Sections in Nova Scotia. 2008.
- 9  
10 (2) The Perinatal Epidemiology Research Unit. Nova Scotia Atlee Perinatal Database Report of  
11 Indicators: 2005-2014. 2015 Dec.
- 12  
13  
14 (3) Edwards J, Peterson K, Mu Y, Banerjee S, Allen Bridson K, Morrell G, et al. National  
15 Healthcare Safety Network (NHSN) report: Data summary for 2006 through 2008, issued  
16 December 2009. *Am J Infect Control* 2009;37(10):783-805.
- 17  
18  
19 (4) Worth L, Bull A, Spelman T, Brett J, Richards M. Diminishing surgical site infections in  
20 Australia: time trends in infection rates, pathogens and antimicrobial resistance using a  
21 comprehensive Victorian surveillance program, 2002-2013. *Infect Control Hosp Epidemiol*  
22 2015;36(4):409-416.
- 23  
24  
25 (5) Lakhan P, Doherty J, Jones M, Clements A. A systematic review of maternal intrinsic risk  
26 factors associated with surgical site infection following Caesarean section. *Healthc Infect*  
27 2010;15(2):35-41.
- 28  
29  
30 (6) Anderson V, Chaboyer W, Gillespie B. The relationship between obesity and surgical site  
31 infections in women undergoing caesarean sections: An integrative review. *Midwifery*  
32 2013;29(12):1331-1338.
- 33  
34  
35 (7) Marchi J, Berg M, Dencker A, Olander EK, Begley C. Risks associated with obesity in  
36 pregnancy, for the mother and baby: a systematic review of reviews. *Obes Rev* 2015;16(8):621-  
37 638.
- 38  
39  
40 (8) Wloch C, Wilson J, Lamagni T, Harrington P, Charlett A, Sheridan E. Risk factors for  
41 surgical site infection following caesarean section in England: results from a multicentre cohort  
42 study. *BJOG* 2012 Oct;119(11):1324-1333.
- 43  
44  
45 (9) Schneid-Kofman N, Sheiner E, Levy A, Holcberg G. Risk factors for wound infection  
46 following cesarean deliveries. *Int J Gynaecol Obstet* 2005 July;90(1):10-15.
- 47  
48  
49 (10) Merchavy S, Levy A, Holcberg G, Freedman EN, Sheiner E. Method of placental removal  
50 during cesarean delivery and postpartum complications. *Int J Gynecol Obstet* 2007;98(3):232-  
51 236.
- 52  
53  
54 (11) van Schalkwyk J, Van Eyk N, Society of Obstetricians and Gynaecologists of Canada  
55 Infectious Diseases Committee. Antibiotic prophylaxis in obstetric procedures. *J Obstet*  
56 *Gynaecol Can* 2010 Sep;32(9):878-92.
- 57  
58  
59  
60

1  
2  
3 (12) Ayoub F, Quirke M, Conroy R, Hill A. Chlorhexidine-alcohol versus povidone-iodine for  
4 pre-operative skin preparation: A systematic review and meta-analysis. *IJSopen* 2015;1:41-46.  
5  
6

7 (13) The Perinatal Epidemiology Research Unit. Nova Scotia Atlee Perinatal Database: Report  
8 of Indicators: 2002-2011. 2012 Dec;2.  
9

10 (14) World Health Organization. Obesity: Preventing and Managing the Global  
11 Epidemic. Report of a WHO Consultation. WHO Technical Report Series 2000;894.  
12  
13

14 (15) Allen VM, O'Connell CM, Baskett TF. Maternal morbidity associated with cesarean  
15 delivery without labor compared with induction of labor at term. *Obstet Gynecol*  
16 2006;108(2):286-294.  
17  
18

19 (16) Corcoran S, Jackson V, Coulter Smith S, Loughrey J, McKenna P, Cafferkey M. Surgical  
20 site infection after cesarean section: Implementing 3 changes to improve the quality of patient  
21 care. *Am J Infect Control* 2013;41(12):1258-1263.  
22  
23

24 (17) Delgado Rodríguez M, Gómez Ortega A, Sillero Arenas M, Llorca J. Epidemiology of  
25 surgical-site infections diagnosed after hospital discharge: a prospective cohort study. *Infect*  
26 *Control Hosp Epidemiol* 2001;22(1):24-30.  
27  
28

29 (18) Daneman N, Ma X, Eng-Chong M, Callery S, Guttmann A. Validation of administrative  
30 population-based data sets for the detection of cesarean delivery surgical site infection. *Infect*  
31 *Control Hosp Epidemiol* 2011 Dec;32(12):1213-1215.  
32  
33

34 (19) Goto M, Ohl M, Schweizer M, Perencevich E. Accuracy of administrative code data for the  
35 surveillance of healthcare-associated infections: a systematic review and meta-analysis. *Clin*  
36 *Infect Dis* 2014;58(5):688-696.  
37  
38  
39  
40  
41  
42  
43  
44  
45  
46  
47  
48  
49  
50  
51  
52  
53  
54  
55  
56  
57  
58  
59  
60

1  
2  
3  
4  
5  
6  
7  
8  
9  
10  
11  
12  
13  
14  
15  
16  
17  
18  
19  
20  
21  
22  
23  
24  
25  
26  
27  
28  
29  
30  
31  
32  
33  
34  
35  
36  
37  
38  
39  
40  
41  
42  
43  
44  
45  
46  
47  
48  
49  
50  
51  
52  
53  
54  
55  
56  
57  
58  
59  
60

Figure 1: Surgical site infection rate by year

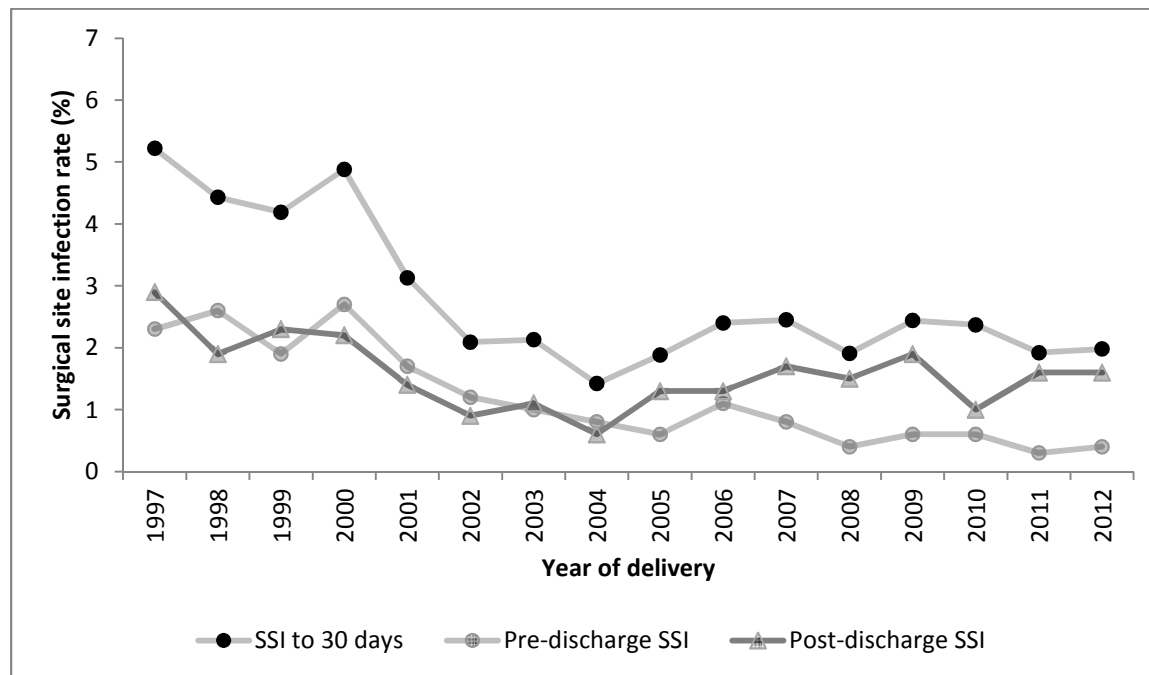

Confidential



Table 1: Potential risk factors for SSI that were examined, by the level of significance in univariate analyses

| Factors not associated with SSI ( $p \geq 0.10$ )                     | Factors associated with SSI ( $p < 0.10$ )                                           |
|-----------------------------------------------------------------------|--------------------------------------------------------------------------------------|
| Maternal residence (urban, rural)                                     | Number of C/S in delivery hospital (<130, 130-949, 950-1249, $\geq 1250$ )           |
| Maternal influenza immunization in pregnancy (no, yes)                | Region of maternal residence (A, B, C, D)                                            |
| SSI after previous C/S (no, yes)                                      | Neighbourhood level income quintile (1, $\geq 2$ )                                   |
| Season of delivery (Dec-Feb, Mar-May, Jun-Aug, Oct-Nov)               | Maternal age (<25, 25-34, $\geq 35$ years)                                           |
| Type of C/S (low segment transverse, other)                           | Pre-pregnancy weight (<53, 53-<67, 67-<77, 77-<87, 87-<98, $\geq 98$ kg, missing)    |
| Instrumentation use (no, forceps or vacuum)                           | Marital status (married or common-law, other, missing)                               |
| General anesthesia during labour and/or delivery (no, yes)            | Smoking during pregnancy (no, yes)                                                   |
| Other procedures performed during C/S (no, yes)                       | Alcohol or drug abuse during pregnancy (no, yes)                                     |
| Presentation at delivery (other, vertex, missing)                     | Non-obstetric pre-existing health conditions affecting pregnancy (no, yes)           |
| Number of fetuses (1, $\geq 2$ )                                      | Hypertension (no, pre-existing, gestational or unspecified, preeclampsia)            |
| Diagnostic and/or therapeutic procedures performed on fetus (no, yes) | Diabetes (no, pre-existing, gestational)                                             |
|                                                                       | Anemia during pregnancy (no, yes)                                                    |
|                                                                       | Depression (no, yes)                                                                 |
|                                                                       | Anticoagulation therapy during pregnancy (no, yes)                                   |
|                                                                       | Parity (primiparous, multiparous)                                                    |
|                                                                       | Mode of delivery in last pregnancy (none, vaginal, C/S)                              |
|                                                                       | Previous C/S (none, 1, $\geq 2$ )                                                    |
|                                                                       | Weight gain during pregnancy (<10, 10-<30, $\geq 30$ kg, missing)                    |
|                                                                       | Chorioamnionitis (no, yes)                                                           |
|                                                                       | Diagnostic and/or therapeutic procedure(s) performed on mother (no, yes)             |
|                                                                       | Steroid use $\geq 48$ hours before delivery for fetal lung maturity (no, yes)        |
|                                                                       | Cervical dilation at the last examination before Caesarean section (0, 1-3, 4-10 cm) |
|                                                                       | Time between rupture of membranes to delivery ( $\leq 1$ , 2-11, $\geq 12$ hour)     |
|                                                                       | Stage of labour before C/S (none, 1 <sup>st</sup> , 2 <sup>nd</sup> )                |
|                                                                       | Spontaneous rupture of membranes (no, yes)                                           |
|                                                                       | Length of antepartum stay (<24, 24-49, $\geq 50$ hours)                              |
|                                                                       | Year of delivery (1997-2000, 2001-2004, 2005-2008, 2009-2012)                        |
|                                                                       | Delivering on a weekend (no, yes)                                                    |
|                                                                       | Primary indication for C/S (breech, dystocia, fetal distress, other, previous C/S)   |
|                                                                       | Regional anesthesia during labour and/or delivery (no, yes)                          |
|                                                                       | Antibiotic therapy (yes, no)                                                         |
|                                                                       | Maternal blood transfusion (no, yes)                                                 |
|                                                                       | Infant birth weight (<2500, 2500-4000, $\geq 4000$ g)                                |
|                                                                       | Apgar score at five minutes (<7, $\geq 7$ )                                          |

1  
2  
3  
4  
5  
6  
7  
8  
9  
10  
11  
12  
13  
14  
15  
16  
17  
18  
19  
20  
21  
22  
23  
24  
25  
26  
27  
28  
29  
30  
31  
32  
33  
34  
35  
36  
37  
38  
39  
40  
41  
42  
43  
44  
45  
46  
47  
48  
49

|  |                                                       |
|--|-------------------------------------------------------|
|  | Gestational age (<37, 37-39 <sup>6</sup> , ≥40 weeks) |
|  | Breastfeeding at discharge (yes, no)                  |

C/S=Caesarean section; SSI=surgical site infection

Confidential

Table 2: Risk factors for surgical site infection following Caesarean section to 30 days postpartum

| Risk factor                            | % of total* | No.    |     | Adjusted OR (95% CI) |
|----------------------------------------|-------------|--------|-----|----------------------|
|                                        |             | No SSI | SSI |                      |
| Year of delivery                       |             |        |     |                      |
| 1997-2000                              | 22.0        | 6891   | 335 | 2.23 (1.81-2.75)     |
| 2001-2004                              | 26.5        | 8532   | 190 | 1.12 (0.90-1.39)     |
| 2005-2008                              | 27.0        | 8670   | 193 | 1.02 (0.82-1.25)     |
| 2009-2012                              | 24.5        | 7880   | 185 | Reference            |
| Maternal age, yr                       |             |        |     |                      |
| <25                                    | 18.6        | 5876   | 224 | 1.13 (0.94-1.36)     |
| 25-34                                  | 61.5        | 19719  | 506 | Reference            |
| ≥35                                    | 19.9        | 6378   | 173 | 1.21 (1.01-1.44)     |
| Parity                                 |             |        |     |                      |
| Primiparous                            | 49.5        | 15723  | 537 | Reference            |
| Multiparous                            | 50.5        | 16250  | 366 | 0.78 (0.67-0.92)     |
| Marital status                         |             |        |     |                      |
| Married/common-law                     | 72.7        | 23323  | 572 | Reference            |
| Single/divorced/separated/widowed      | 22.3        | 7044   | 283 | 1.31 (1.10-1.55)     |
| Missing                                | 5.0         | 1606   | 48  | 1.13 (0.81-1.56)     |
| Quintile of neighbourhood-level income |             |        |     |                      |
| 1 (lowest)                             | 20.1        | 6349   | 259 | 1.36 (1.16-1.58)     |
| 2-5                                    | 79.9        | 25624  | 644 | Reference            |
| Smoking during pregnancy               |             |        |     |                      |
| No                                     | 78.5        | 25151  | 643 | Reference            |
| Yes                                    | 21.5        | 6822   | 260 | 1.18 (1.00-1.38)     |
| Alcohol or drug abuse                  |             |        |     |                      |
| No                                     | 98.6        | 31543  | 877 | Reference            |
| Yes                                    | 1.4         | 430    | 26  | 1.64 (1.07-2.51)     |
| Pre-pregnancy weight, kg               |             |        |     |                      |
| <53                                    | 8.1         | 2593   | 61  | 1.03 (0.77-1.39)     |
| 53-<67                                 | 29.4        | 9463   | 194 | Reference            |
| 67-<77                                 | 16.9        | 5410   | 133 | 1.26 (1.01-1.58)     |
| 77-<87                                 | 12.1        | 3868   | 108 | 1.42 (1.11-1.81)     |
| 87-<98                                 | 7.8         | 2480   | 85  | 1.84 (1.41-2.41)     |
| ≥98                                    | 9.5         | 2954   | 185 | 3.56 (2.85-4.45)     |
| Missing                                | 16.2        | 5205   | 137 | 1.48 (1.09-2.01)     |
| Weight gain during pregnancy, kg       |             |        |     |                      |
| <10                                    | 16.8        | 5353   | 155 | 0.77 (0.63-0.94)     |
| 10-<30                                 | 55.7        | 17809  | 489 | Reference            |
| ≥30                                    | 1.9         | 599    | 37  | 1.99 (1.40-2.84)     |
| Missing                                | 25.7        | 8212   | 222 | 1.05 (0.82-1.33)     |

| Risk factor                                        | % of total* | No.    |     | Adjusted OR (95% CI) |
|----------------------------------------------------|-------------|--------|-----|----------------------|
|                                                    |             | No SSI | SSI |                      |
| Non-obstetric conditions affecting pregnancy       |             |        |     |                      |
| No                                                 | 80.9        | 25941  | 671 | Reference            |
| Yes                                                | 19.1        | 6032   | 232 | 1.28 (1.09-1.50)     |
| Diabetes                                           |             |        |     |                      |
| No                                                 | 93.5        | 29923  | 802 | Reference            |
| Pre-existing                                       | 0.6         | 194    | 11  | 1.63 (0.87-3.08)     |
| Gestational                                        | 5.9         | 1856   | 90  | 1.47 (1.16-1.86)     |
| Depression during pregnancy                        |             |        |     |                      |
| No                                                 | 95.6        | 30567  | 847 | Reference            |
| Yes                                                | 4.4         | 1406   | 56  | 1.39 (1.04-1.86)     |
| Anticoagulation therapy during pregnancy           |             |        |     |                      |
| No                                                 | 99.1        | 31700  | 880 | Reference            |
| Yes                                                | 0.9         | 273    | 23  | 2.62 (1.67-4.12)     |
| Chorioamnionitis                                   |             |        |     |                      |
| No                                                 | 97.8        | 31307  | 848 | Reference            |
| Yes                                                | 2.2         | 666    | 55  | 2.80 (2.08-3.76)     |
| Stage of labour before Caesarean section           |             |        |     |                      |
| None                                               | 48.6        | 15645  | 327 | Reference            |
| First                                              | 32.0        | 10159  | 349 | 1.21 (1.01-1.44)     |
| Second                                             | 19.5        | 6169   | 227 | 1.55 (1.27-1.89)     |
| Antibiotic therapy                                 |             |        |     |                      |
| Yes                                                | 37.1        | 11788  | 400 | Reference            |
| No                                                 | 62.9        | 20185  | 503 | 1.29 (1.11-1.50)     |
| Maternal blood transfusion                         |             |        |     |                      |
| No                                                 | 99.0        | 31675  | 878 | Reference            |
| Yes                                                | 1.0         | 298    | 25  | 2.69 (1.75-4.14)     |
| Gestational age, weeks                             |             |        |     |                      |
| <37                                                | 9.7         | 3057   | 116 | 1.33 (1.08-1.66)     |
| 37-39 <sup>+6</sup>                                | 57.1        | 18331  | 439 | Reference            |
| ≥40                                                | 33.3        | 10585  | 348 | 1.10 (0.94-1.29)     |
| Number of Caesarean sections per hospital per year |             |        |     |                      |
| <130                                               | 25.0        | 8070   | 155 | Reference            |
| 130-949                                            | 21.8        | 6893   | 282 | 2.22 (1.80-2.74)     |
| 950-1249                                           | 27.7        | 8787   | 312 | 1.87 (1.51-2.31)     |
| ≥1250                                              | 25.5        | 8223   | 154 | 1.43 (1.11-1.83)     |

Note: CI=confidence interval, OR=odds ratio, SSI=surgical site infection

\*32876 deliveries by Caesarean section included in the analysis (1115 deliveries excluded due to missing values on neighbourhood-level income ( $n=724$ ), smoking ( $n=283$ ), and/or gestational age ( $n=118$ )).

Table 3: Risk factors for pre- and post-discharge surgical site infection following Caesarean section

| Risk factor                            | No SSI,<br>no.* | Pre-discharge SSI |                      | Post-discharge SSI |                      | <i>p</i> value <sup>†</sup> |
|----------------------------------------|-----------------|-------------------|----------------------|--------------------|----------------------|-----------------------------|
|                                        |                 | No.*              | Adjusted OR (95% CI) | No.*               | Adjusted OR (95% CI) |                             |
| Year of delivery                       |                 |                   |                      |                    |                      |                             |
| 1997-2000                              | 6947            | 173               | 5.46 (3.85-7.74)     | 164                | 1.26 (0.98-1.63)     | <0.001                      |
| 2001-2004                              | 8551            | 102               | 2.84 (1.95-4.14)     | 88                 | 0.62 (0.47-0.81)     | <0.001                      |
| 2005-2008                              | 8687            | 64                | 1.52 (1.03-2.25)     | 130                | 0.87 (0.68-1.11)     | 0.017                       |
| 2009-2012                              | 7896            | 40                | Reference            | 145                | Reference            |                             |
| Maternal age, yr                       |                 |                   |                      |                    |                      |                             |
| <25                                    | 5906            | 83                | 1.11 (0.84-1.46)     | 142                | 1.19 (0.94-1.50)     | 0.703                       |
| 25-34                                  | 19782           | 212               | Reference            | 296                | Reference            |                             |
| ≥35                                    | 6393            | 84                | 1.38 (1.06-1.79)     | 89                 | 1.05 (0.83-1.34)     | 0.137                       |
| Marital status                         |                 |                   |                      |                    |                      |                             |
| Married/common-law                     | 23381           | 251               | Reference            | 323                | Reference            |                             |
| Single/divorced/separated/widowed      | 7087            | 112               | 1.36 (1.06-1.78)     | 172                | 1.30 (1.05-1.61)     | 0.750                       |
| Missing                                | 1613            | 16                | 1.26 (0.73-2.17)     | 32                 | 1.08 (0.73-1.61)     | 0.652                       |
| Quintile of neighbourhood-level income |                 |                   |                      |                    |                      |                             |
| 1 (lowest)                             | 6378            | 97                | 1.20 (0.94-1.53)     | 162                | 1.48 (1.22-1.80)     | 0.172                       |
| 2-5                                    | 25703           | 282               | Reference            | 365                | Reference            |                             |
| Smoking during pregnancy               |                 |                   |                      |                    |                      |                             |
| No                                     | 25222           | 283               | Reference            | 362                | Reference            |                             |
| Yes                                    | 6859            | 96                | 0.97 (0.76-1.25)     | 165                | 1.41 (1.15-1.73)     | 0.020                       |
| Pre-pregnancy weight, kg               |                 |                   |                      |                    |                      |                             |
| <53                                    | 2610            | 28                | 1.06 (0.69-1.62)     | 35                 | 1.10 (0.74-1.63)     | 0.895                       |
| 53-<67                                 | 9502            | 92                | Reference            | 102                | Reference            |                             |
| 67-<77                                 | 5419            | 51                | 1.02 (0.72-1.44)     | 82                 | 1.46 (1.09-1.97)     | 0.117                       |
| 77-<87                                 | 3876            | 46                | 1.26 (0.88-1.81)     | 62                 | 1.52 (1.10-2.10)     | 0.451                       |
| 87-<98                                 | 2484            | 37                | 1.64 (1.11-2.42)     | 48                 | 1.94 (1.36-2.77)     | 0.521                       |
| ≥98                                    | 2966            | 72                | 2.91 (2.11-4.01)     | 114                | 3.93 (2.92-5.30)     | 0.170                       |
| Missing                                | 522             | 53                | 1.03 (0.65-1.62)     | 84                 | 1.90 (1.24-2.89)     | 0.051                       |

| Risk factor                                        | No SSI,<br>no.* | Pre-discharge SSI |                      | Post-discharge SSI |                      | <i>p</i> value <sup>†</sup> |
|----------------------------------------------------|-----------------|-------------------|----------------------|--------------------|----------------------|-----------------------------|
|                                                    |                 | No.*              | Adjusted OR (95% CI) | No.*               | Adjusted OR (95% CI) |                             |
| Stage of labour before Caesarean section           |                 |                   |                      |                    |                      |                             |
| None                                               | 15701           | 156               | Reference            | 172                | Reference            |                             |
| First                                              | 10190           | 133               | 1.02 (0.79-1.31)     | 218                | 1.48 (1.18-1.86)     | 0.030                       |
| Second                                             | 6190            | 90                | 1.37 (1.04-1.80)     | 137                | 1.75 (1.35-2.26)     | 0.191                       |
| Antibiotic therapy                                 |                 |                   |                      |                    |                      |                             |
| Yes                                                | 11848           | 192               | Reference            | 211                | Reference            |                             |
| No                                                 | 20233           | 187               | 1.47 (1.18-1.84)     | 316                | 1.17 (0.96-1.41)     | 0.105                       |
| Maternal blood transfusion                         |                 |                   |                      |                    |                      |                             |
| No                                                 | 31782           | 369               | Reference            | 512                | Reference            |                             |
| Yes                                                | 299             | 10                | 2.86 (1.47-5.55)     | 15                 | 2.78 (1.60-4.80)     | 0.944                       |
| Number of fetuses                                  |                 |                   |                      |                    |                      |                             |
| Singleton                                          | 31045           | 352               | Reference            | 516                | Reference            |                             |
| Multiples                                          | 1036            | 27                | 2.14 (1.41-3.26)     | 11                 | 0.66 (0.36-1.21)     | <0.001                      |
| Number of Caesarean sections per hospital per year |                 |                   |                      |                    |                      |                             |
| <130                                               | 8086            | 51                | Reference            | 105                | Reference            |                             |
| 130-949                                            | 6933            | 126               | 3.21 (2.30-4.50)     | 157                | 1.75 (1.34-2.29)     | 0.005                       |
| 950-1249                                           | 8816            | 143               | 2.58 (1.81-3.67)     | 170                | 1.56 (1.19-2.05)     | 0.027                       |
| ≥1250                                              | 8246            | 59                | 1.81 (1.20-2.75)     | 95                 | 1.24 (0.91-1.70)     | 0.150                       |

Note: CI=confidence interval, OR=odds ratio, SSI=surgical site infection

\* 32987 deliveries by Caesarean section included in the analysis (1004 deliveries excluded due to missing values on neighbourhood-level income ( $n=724$ ) and/or smoking ( $n=283$ )).

<sup>†</sup> *p* value for the association between the risk factor and SSI timing (pre- vs. post-discharge).

Appendix 1: Univariate associations between surgical site infection following Caesarean section and potential risk factors

| Potential Risk Factor                             | No SSI<br>n(%) | SSI<br>n(%) | <i>p</i> |
|---------------------------------------------------|----------------|-------------|----------|
| Year of delivery (n=33,991)                       |                |             |          |
| 1997-2000                                         | 7045 (95.3)    | 346 (4.7)   | <0.001   |
| 2001-2004                                         | 8672 (97.8)    | 192 (2.2)   |          |
| 2005-2008                                         | 8806 (97.8)    | 194 (2.2)   |          |
| 2009-2012                                         | 8545 (97.8)    | 191 (2.2)   |          |
| Season of delivery (n=33,991)                     |                |             |          |
| December-February                                 | 7474 (97.4)    | 201 (2.6)   | 0.943    |
| March-May                                         | 8525 (97.3)    | 238 (2.7)   |          |
| June-August                                       | 8659 (97.2)    | 246 (2.8)   |          |
| September-November                                | 8410 (97.3)    | 238 (2.8)   |          |
| Delivering on a weekend (n=33,991)                |                |             |          |
| No                                                | 27441 (97.4)   | 741 (2.6)   | 0.032    |
| Yes                                               | 5627 (96.9)    | 182 (3.1)   |          |
| Region of maternal residence (n=33,991)           |                |             |          |
| A                                                 | 15584 (97.4)   | 424 (2.7)   | <0.001   |
| B                                                 | 5880 (96.4)    | 217 (3.6)   |          |
| C                                                 | 6135 (97.4)    | 163 (2.6)   |          |
| D                                                 | 5469 (97.9)    | 119 (2.1)   |          |
| Maternal residence (n=33,971)                     |                |             |          |
| Urban                                             | 22978 (97.2)   | 655 (2.8)   | 0.342    |
| Rural                                             | 10071 (97.4)   | 267 (2.6)   |          |
| Maternal age, years (n=33,991)                    |                |             |          |
| <25                                               | 6077 (96.4)    | 228 (3.6)   | <0.001   |
| 25-34                                             | 20392 (97.5)   | 516 (2.5)   |          |
| ≥35                                               | 6599 (97.4)    | 179 (2.6)   |          |
| Parity (n=33,991)                                 |                |             |          |
| Primiparous                                       | 16268 (96.8)   | 545 (3.2)   | <0.001   |
| Multiparous                                       | 16800 (97.8)   | 378 (2.2)   |          |
| Marital status (n=33,991)                         |                |             |          |
| Married/common-law                                | 24102 (97.6)   | 587 (2.4)   | <0.001   |
| Single/divorced/separated/widowed                 | 7286 (96.2)    | 287 (3.8)   |          |
| Missing                                           | 1680 (97.2)    | 49 (2.8)    |          |
| Quintile of neighbourhood-level income (n=33,267) |                |             |          |
| 1 (lowest)                                        | 6441 (96.1)    | 262 (3.9)   | <0.001   |
| 2-5                                               | 25912 (97.6)   | 652 (2.45)  |          |
| Smoking during pregnancy (n=33,708)               |                |             |          |
| No                                                | 25820 (97.5)   | 651 (2.5)   | <0.001   |
| Yes                                               | 6973 (96.4)    | 264 (3.7)   |          |

| Potential Risk Factor                                                       | No SSI<br>n(%) | SSI<br>n(%) | <i>p</i> |
|-----------------------------------------------------------------------------|----------------|-------------|----------|
| Alcohol or drug abuse during pregnancy (n=33,991)                           |                |             |          |
| No                                                                          | 32621 (97.3)   | 897 (2.7)   | <0.001   |
| Yes                                                                         | 447 (94.5)     | 26 (5.5)    |          |
| Pre-pregnancy weight, kg (n=33,991)                                         |                |             |          |
| <53                                                                         | 2680 (97.7)    | 63 (2.3)    | <0.001   |
| 53-66.9                                                                     | 9787 (98.0)    | 199 (2.0)   |          |
| 67-76.9                                                                     | 5553 (97.6)    | 136 (2.4)   |          |
| 77-86.9                                                                     | 3976 (97.4)    | 108 (2.6)   |          |
| 87-97.9                                                                     | 2548 (96.7)    | 86 (3.3)    |          |
| ≥98                                                                         | 3043 (94.2)    | 187 (5.8)   |          |
| Missing                                                                     | 5481 (97.4)    | 144 (2.6)   |          |
| Weight gain during pregnancy, kg (n=33,991)                                 |                |             |          |
| <10                                                                         | 5493 (97.2)    | 158 (2.8)   | <0.001   |
| 10-29.9                                                                     | 18355 (97.4)   | 498 (2.6)   |          |
| ≥30                                                                         | 615 (94.2)     | 38 (5.8)    |          |
| Missing                                                                     | 8605 (97.4)    | 229 (2.6)   |          |
| Non-obstetric pre-existing health conditions affecting pregnancy (n=33,991) |                |             |          |
| No                                                                          | 26761 (97.5)   | 681 (2.5)   | <0.001   |
| Yes                                                                         | 6307 (96.3)    | 242 (3.7)   |          |
| Hypertension (n=33,991)                                                     |                |             |          |
| No                                                                          | 28719 (97.5)   | 738 (2.5)   | <0.001   |
| Pre-existing                                                                | 515 (95.7)     | 23 (4.3)    |          |
| Gestational or unspecified                                                  | 2605 (96.0)    | 110 (4.1)   |          |
| Preeclampsia                                                                | 1229 (95.9)    | 52 (4.1)    |          |
| Diabetes (n=33,991)                                                         |                |             |          |
| No                                                                          | 30955 (97.4)   | 819 (2.6)   | <0.001   |
| Pre-existing                                                                | 203 (94.9)     | 11 (5.1)    |          |
| Gestational                                                                 | 1910 (95.4)    | 93 (4.6)    |          |
| Anemia during pregnancy (n=33,991)                                          |                |             |          |
| No                                                                          | 30551 (97.3)   | 837 (2.7)   | 0.063    |
| Yes                                                                         | 2517 (96.7)    | 86 (3.3)    |          |
| Depression during pregnancy (n=33,991)                                      |                |             |          |
| No                                                                          | 31592 (97.3)   | 866 (2.7)   | 0.021    |
| Yes                                                                         | 1476 (96.3)    | 57 (3.7)    |          |
| Anticoagulation therapy during pregnancy (n=33,991)                         |                |             |          |
| No                                                                          | 32774 (97.3)   | 900 (2.7)   | <0.001   |
| Yes                                                                         | 294 (92.7)     | 23 (7.3)    |          |
| Chorioamnionitis during pregnancy (n=33,991)                                |                |             |          |
| No                                                                          | 32383 (97.4)   | 867 (2.6)   | <0.001   |
| Yes                                                                         | 685 (92.4)     | 56 (7.6)    |          |
| Maternal influenza vaccination during pregnancy (n=33,991)                  |                |             |          |
| No                                                                          | 32105 (97.3)   | 901 (2.7)   | 0.360    |
| Yes                                                                         | 963 (97.8)     | 22 (2.2)    |          |



| Potential Risk Factor                                                             | No SSI<br>n(%) | SSI<br>n(%) | <i>p</i> |
|-----------------------------------------------------------------------------------|----------------|-------------|----------|
| Mode of delivery in last pregnancy (n=33,991)                                     |                |             |          |
| Not applicable                                                                    | 18188 (96.9)   | 589 (3.1)   | <0.001   |
| Vaginal                                                                           | 4187 (97.4)    | 111 (2.6)   |          |
| Caesarean section                                                                 | 10693 (98.0)   | 223 (2.0)   |          |
| Number of previous Caesarean sections (n=33,991)                                  |                |             |          |
| None                                                                              | 20748 (96.9)   | 663 (3.1)   | <0.001   |
| One                                                                               | 9695 (98.0)    | 199 (2.0)   |          |
| Two or more                                                                       | 2625 (97.7)    | 61 (2.3)    |          |
| SSI after previous Caesarean section(n=33,991)                                    |                |             |          |
| No                                                                                | 32731 (97.3)   | 908 (2.7)   | 0.405    |
| Yes                                                                               | 337 (95.7)     | 15 (4.3)    |          |
| Steroid use $\geq$ 48 hrs before delivery for fetal lung maturity (n=33,991)      |                |             |          |
| None                                                                              | 31919 (97.3)   | 873 (2.7)   | 0.002    |
| Yes                                                                               | 1149 (95.8)    | 50 (4.2)    |          |
| Length of antepartum stay, hrs (n=33,969)                                         |                |             |          |
| <24                                                                               | 27786 (97.5)   | 722 (2.5)   | <0.001   |
| 24-49                                                                             | 3029 (96.8)    | 99 (3.2)    |          |
| $\geq$ 50                                                                         | 2231 (95.6)    | 102 (4.4)   |          |
| Stage of labour before Caesarean section (n=33,990)                               |                |             |          |
| None                                                                              | 16225 (98.0)   | 339 (2.1)   | <0.001   |
| First                                                                             | 10478 (96.7)   | 354 (3.3)   |          |
| Second                                                                            | 6364 (96.5)    | 230 (3.5)   |          |
| Cervical dilation in the last examination before Caesarean section, cm (n=33,130) |                |             |          |
| None                                                                              | 16758 (98.0)   | 346 (2.0)   | <0.001   |
| 1-3                                                                               | 3371 (96.8)    | 113 (3.2)   |          |
| 4-10                                                                              | 12104 (96.5)   | 438 (3.5)   |          |
| Time between rupture of membranes to delivery, hrs (n=33,690)                     |                |             |          |
| <1                                                                                | 16501 (97.8)   | 370 (2.2)   | <0.001   |
| 2-11                                                                              | 8044 (96.9)    | 254 (3.1)   |          |
| $\geq$ 12                                                                         | 8228 (96.6)    | 293 (3.4)   |          |
| Spontaneous rupture of membranes (n=33,646)                                       |                |             |          |
| No                                                                                | 23614 (97.4)   | 630 (2.6)   | 0.021    |
| Yes                                                                               | 9116 (97.0)    | 286 (3.0)   |          |
| Primary indication for Caesarean section (n=33,991)                               |                |             |          |
| Breech                                                                            | 4471 (97.6)    | 109 (2.4)   | <0.001   |
| Dystocia                                                                          | 8602 (96.5)    | 311 (3.5)   |          |
| Fetal distress                                                                    | 5066 (96.6)    | 176 (3.4)   |          |
| Other                                                                             | 5120 (97.4)    | 139 (2.6)   |          |
| Previous Caesarean section                                                        | 9809 (98.1)    | 188 (1.9)   |          |
| Type of Caesarean section (n=33,991)                                              |                |             |          |
| Low segment transverse                                                            | 32338 (97.3)   | 902 (2.7)   | 0.845    |
| Other                                                                             | 730 (97.2)     | 21 (2.8)    |          |

| Potential Risk Factor                                                     | No SSI<br>n(%) | SSI<br>n(%) | <i>p</i> |
|---------------------------------------------------------------------------|----------------|-------------|----------|
| Instrumentation used during Caesarean section (n=33,991)                  |                |             |          |
| No                                                                        | 30492 (97.3)   | 843 (2.7)   | 0.360    |
| Forceps or vacuum                                                         | 2576 (97.0)    | 80 (3.0)    |          |
| General anesthesia during labour or delivery (n=33,991)                   |                |             |          |
| No                                                                        | 30301 (97.4)   | 821 (2.6)   | 0.005    |
| Yes                                                                       | 2767 (96.4)    | 102 (3.6)   |          |
| Regional anesthesia during labour or delivery (n=33,991)                  |                |             |          |
| No                                                                        | 2100 (96.8)    | 70 (3.2)    | 0.152    |
| Yes                                                                       | 30968 (97.3)   | 853 (2.7)   |          |
| Diagnostic and/or therapeutic procedure(s) performed on mother (n=33,991) |                |             |          |
| No                                                                        | 32112 (97.3)   | 885 (2.7)   | 0.034    |
| Yes                                                                       | 956 (96.2)     | 38 (3.8)    |          |
| Diagnostic and/or therapeutic procedure(s) performed on fetus (n=33,991)  |                |             |          |
| No                                                                        | 31702 (97.3)   | 883 (2.7)   | 0.770    |
| Yes                                                                       | 1366 (97.2)    | 40 (2.8)    |          |
| Other procedures performed during Caesarean section (n=33,991)            |                |             |          |
| No                                                                        | 26875 (97.3)   | 756 (2.7)   | 0.556    |
| Yes                                                                       | 6193 (97.4)    | 167 (2.6)   |          |
| Antibiotic prophylaxis (n=33,991)                                         |                |             |          |
| Yes                                                                       | 20909 (97.6)   | 510 (2.4)   | <0.001   |
| No                                                                        | 12159 (96.7)   | 413 (3.3)   |          |
| Maternal blood transfusion (n=33,991)                                     |                |             |          |
| No                                                                        | 32749 (97.3)   | 896 (2.7)   | <0.001   |
| Yes                                                                       | 319 (92.2)     | 27 (7.8)    |          |
| Number of fetuses (n=33,991)                                              |                |             |          |
| Singleton                                                                 | 31992 (97.3)   | 884 (2.7)   | 0.116    |
| Multiples                                                                 | 1076 (96.5)    | 39 (3.5)    |          |
| Presentation at delivery (n=33,991)                                       |                |             |          |
| Other                                                                     | 8906 (97.2)    | 260 (2.8)   | 0.314    |
| Vertex                                                                    | 22243 (97.4)   | 601 (2.6)   |          |
| Missing                                                                   | 1919 (96.9)    | 62 (3.1)    |          |
| Gestational age, weeks (n=33,873)                                         |                |             |          |
| <37                                                                       | 3195 (96.4)    | 121 (3.7)   | <0.001   |
| 37-39+6                                                                   | 18900 (97.7)   | 450 (2.3)   |          |
| ≥40                                                                       | 10858 (96.9)   | 349 (3.1)   |          |
| Infant birth weight, g (n=33,967)                                         |                |             |          |
| <2,500                                                                    | 2235 (96.9)    | 72 (3.1)    | 0.001    |
| 2500-3900                                                                 | 29186 (97.4)   | 779 (2.6)   |          |
| ≥4000                                                                     | 1626 (95.9)    | 69 (4.1)    |          |
| Apgar score at 5 minutes (n=33,794)                                       |                |             |          |
| 0-6                                                                       | 619 (94.9)     | 33 (5.1)    | <0.001   |
| 7-10                                                                      | 32256 (97.3)   | 886 (2.7)   |          |

| Potential Risk Factor                                                      | No SSI<br>n(%) | SSI<br>n(%) | <i>p</i> |
|----------------------------------------------------------------------------|----------------|-------------|----------|
| Breastfeeding at discharge (n=33,677)                                      |                |             |          |
| Yes                                                                        | 23129 (97.6)   | 572 (2.4)   | <0.001   |
| No                                                                         | 9645 (96.7)    | 331 (3.3)   |          |
| Number of Caesarean sections in the delivery hospital, per year (n=33,991) |                |             |          |
| <130                                                                       | 8364 (98.1)    | 162 (1.9)   | <0.001   |
| 130-949                                                                    | 7107 (96.1)    | 286 (3.9)   |          |
| 950-1249                                                                   | 9133 (96.6)    | 321 (3.4)   |          |
| ≥1250                                                                      | 8464 (98.2)    | 154 (1.8)   |          |

SSI=surgical site infection

Confidential

## STROBE Statement—checklist of items that should be included in reports of observational studies

|                              | Item No | Recommendation                                                                                                                                                                                                                                                                                                                                                                                                                                                                                                                                                                                                                                                                                                                                                                                           |
|------------------------------|---------|----------------------------------------------------------------------------------------------------------------------------------------------------------------------------------------------------------------------------------------------------------------------------------------------------------------------------------------------------------------------------------------------------------------------------------------------------------------------------------------------------------------------------------------------------------------------------------------------------------------------------------------------------------------------------------------------------------------------------------------------------------------------------------------------------------|
| <b>Title and abstract</b>    | 1       | (a) Indicate the study's design with a commonly used term in the title or the abstract<br>(b) Provide in the abstract an informative and balanced summary of what was done and what was found                                                                                                                                                                                                                                                                                                                                                                                                                                                                                                                                                                                                            |
| <b>Introduction</b>          |         |                                                                                                                                                                                                                                                                                                                                                                                                                                                                                                                                                                                                                                                                                                                                                                                                          |
| Background/rationale         | 2       | Explain the scientific background and rationale for the investigation being reported<br>Page 2                                                                                                                                                                                                                                                                                                                                                                                                                                                                                                                                                                                                                                                                                                           |
| Objectives                   | 3       | State specific objectives, including any prespecified hypotheses<br>Page 2, paragraph 3                                                                                                                                                                                                                                                                                                                                                                                                                                                                                                                                                                                                                                                                                                                  |
| <b>Methods</b>               |         |                                                                                                                                                                                                                                                                                                                                                                                                                                                                                                                                                                                                                                                                                                                                                                                                          |
| Study design                 | 4       | Present key elements of study design early in the paper<br>Page 4, paragraph 3                                                                                                                                                                                                                                                                                                                                                                                                                                                                                                                                                                                                                                                                                                                           |
| Setting                      | 5       | Describe the setting, locations, and relevant dates, including periods of recruitment, exposure, follow-up, and data collection<br>Location - page 4, paragraph 1<br>Dates - page 4, paragraph 2<br>Exposure - page 5, paragraph 2<br>Follow-up - page 5, paragraph 1<br>Data collection - page 4, paragraph 3 & paragraph 4                                                                                                                                                                                                                                                                                                                                                                                                                                                                             |
| Participants                 | 6       | (a) <i>Cohort study</i> —Give the eligibility criteria, and the sources and methods of selection of participants. Describe methods of follow-up<br>Eligibility criteria - page 4, paragraph 2<br>Selection of participants - page 4, paragraph 3<br><i>Case-control study</i> —Give the eligibility criteria, and the sources and methods of case ascertainment and control selection. Give the rationale for the choice of cases and controls<br><i>Cross-sectional study</i> —Give the eligibility criteria, and the sources and methods of selection of participants<br>(b) <i>Cohort study</i> —For matched studies, give matching criteria and number of exposed and unexposed<br>N/A<br><i>Case-control study</i> —For matched studies, give matching criteria and the number of controls per case |
| Variables                    | 7       | Clearly define all outcomes, exposures, predictors, potential confounders, and effect modifiers. Give diagnostic criteria, if applicable<br>Outcomes - page 4, paragraph 4<br>Outcome diagnostic criteria - page 5, paragraph 1<br>Exposures/predictors - page 5, paragraph 2                                                                                                                                                                                                                                                                                                                                                                                                                                                                                                                            |
| Data sources/<br>measurement | 8*      | For each variable of interest, give sources of data and details of methods of assessment (measurement). Describe comparability of assessment methods if there is more than one group<br>Outcomes - page 5, paragraph 2                                                                                                                                                                                                                                                                                                                                                                                                                                                                                                                                                                                   |
| Bias                         | 9       | Describe any efforts to address potential sources of bias<br>N/A                                                                                                                                                                                                                                                                                                                                                                                                                                                                                                                                                                                                                                                                                                                                         |

|    |                        |    |                                                                                                                              |
|----|------------------------|----|------------------------------------------------------------------------------------------------------------------------------|
| 1  |                        |    |                                                                                                                              |
| 2  |                        |    |                                                                                                                              |
| 3  |                        |    |                                                                                                                              |
| 4  | Study size             | 10 | Explain how the study size was arrived at                                                                                    |
| 5  |                        |    | <a href="#">Page 4, paragraph 2</a>                                                                                          |
| 6  |                        |    |                                                                                                                              |
| 7  | Quantitative variables | 11 | Explain how quantitative variables were handled in the analyses. If applicable, describe which groupings were chosen and why |
| 8  |                        |    | <a href="#">Page 5, paragraph 2</a>                                                                                          |
| 9  |                        |    |                                                                                                                              |
| 10 | Statistical methods    | 12 | (a) Describe all statistical methods, including those used to control for confounding                                        |
| 11 |                        |    | <a href="#">Statistical methods: page 6, paragraph 2</a>                                                                     |
| 12 |                        |    | <a href="#">Confounding: page 6, paragraph 2</a>                                                                             |
| 13 |                        |    | (b) Describe any methods used to examine subgroups and interactions                                                          |
| 14 |                        |    | N/A                                                                                                                          |
| 15 |                        |    | (c) Explain how missing data were addressed                                                                                  |
| 16 |                        |    | <a href="#">Page 6, paragraph 2</a>                                                                                          |
| 17 |                        |    | (d) <i>Cohort study</i> —If applicable, explain how loss to follow-up was addressed                                          |
| 18 |                        |    | N/A                                                                                                                          |
| 19 |                        |    | <i>Case-control study</i> —If applicable, explain how matching of cases and controls was addressed                           |
| 20 |                        |    | <i>Cross-sectional study</i> —If applicable, describe analytical methods taking account of sampling strategy                 |
| 21 |                        |    |                                                                                                                              |
| 22 |                        |    | (e) Describe any sensitivity analyses                                                                                        |
| 23 |                        |    | N/A                                                                                                                          |
| 24 |                        |    |                                                                                                                              |
| 25 |                        |    |                                                                                                                              |
| 26 |                        |    |                                                                                                                              |
| 27 |                        |    |                                                                                                                              |
| 28 | Continued on next page |    |                                                                                                                              |
| 29 |                        |    |                                                                                                                              |
| 30 |                        |    |                                                                                                                              |
| 31 |                        |    |                                                                                                                              |
| 32 |                        |    |                                                                                                                              |
| 33 |                        |    |                                                                                                                              |
| 34 |                        |    |                                                                                                                              |
| 35 |                        |    |                                                                                                                              |
| 36 |                        |    |                                                                                                                              |
| 37 |                        |    |                                                                                                                              |
| 38 |                        |    |                                                                                                                              |
| 39 |                        |    |                                                                                                                              |
| 40 |                        |    |                                                                                                                              |
| 41 |                        |    |                                                                                                                              |
| 42 |                        |    |                                                                                                                              |
| 43 |                        |    |                                                                                                                              |
| 44 |                        |    |                                                                                                                              |
| 45 |                        |    |                                                                                                                              |
| 46 |                        |    |                                                                                                                              |
| 47 |                        |    |                                                                                                                              |
| 48 |                        |    |                                                                                                                              |
| 49 |                        |    |                                                                                                                              |
| 50 |                        |    |                                                                                                                              |
| 51 |                        |    |                                                                                                                              |
| 52 |                        |    |                                                                                                                              |
| 53 |                        |    |                                                                                                                              |
| 54 |                        |    |                                                                                                                              |
| 55 |                        |    |                                                                                                                              |
| 56 |                        |    |                                                                                                                              |
| 57 |                        |    |                                                                                                                              |
| 58 |                        |    |                                                                                                                              |
| 59 |                        |    |                                                                                                                              |
| 60 |                        |    |                                                                                                                              |

Continued on next page

**Results**

|                  |     |                                                                                                                                                                                                                                                                          |
|------------------|-----|--------------------------------------------------------------------------------------------------------------------------------------------------------------------------------------------------------------------------------------------------------------------------|
| Participants     | 13* | (a) Report numbers of individuals at each stage of study—eg numbers potentially eligible, examined for eligibility, confirmed eligible, included in the study, completing follow-up, and analysed<br><a href="#">Page 7, paragraph 1</a>                                 |
|                  |     | (b) Give reasons for non-participation at each stage<br><a href="#">N/A</a>                                                                                                                                                                                              |
|                  |     | (c) Consider use of a flow diagram<br><a href="#">N/A</a>                                                                                                                                                                                                                |
| Descriptive data | 14* | (a) Give characteristics of study participants (eg demographic, clinical, social) and information on exposures and potential confounders<br><a href="#">Page 7, paragraph 2</a>                                                                                          |
|                  |     | (b) Indicate number of participants with missing data for each variable of interest<br><a href="#">Appendix 1</a>                                                                                                                                                        |
|                  |     | (c) <i>Cohort study</i> —Summarise follow-up time (eg, average and total amount)<br><a href="#">Page 7, paragraph 1</a>                                                                                                                                                  |
| Outcome data     | 15* | <i>Cohort study</i> —Report numbers of outcome events or summary measures over time<br><a href="#">Page 7, paragraph 1</a>                                                                                                                                               |
|                  |     | <i>Case-control study</i> —Report numbers in each exposure category, or summary measures of exposure                                                                                                                                                                     |
|                  |     | <i>Cross-sectional study</i> —Report numbers of outcome events or summary measures                                                                                                                                                                                       |
| Main results     | 16  | (a) Give unadjusted estimates and, if applicable, confounder-adjusted estimates and their precision (eg, 95% confidence interval). Make clear which confounders were adjusted for and why they were included<br><a href="#">Page 7, paragraph 2, Page 8 paragraphs 1</a> |
|                  |     | (b) Report category boundaries when continuous variables were categorized<br><a href="#">See methods: page 5, paragraph 2</a>                                                                                                                                            |
|                  |     | (c) If relevant, consider translating estimates of relative risk into absolute risk for a meaningful time period<br><a href="#">N/A</a>                                                                                                                                  |
| Other analyses   | 17  | Report other analyses done—eg analyses of subgroups and interactions, and sensitivity analyses<br><a href="#">Page 7, paragraph 2</a>                                                                                                                                    |

**Discussion**

|                  |    |                                                                                                                                                                                                          |
|------------------|----|----------------------------------------------------------------------------------------------------------------------------------------------------------------------------------------------------------|
| Key results      | 18 | Summarise key results with reference to study objectives<br><a href="#">Page 9, paragraphs 1-3; page 10, paragraphs 1-2</a>                                                                              |
| Limitations      | 19 | Discuss limitations of the study, taking into account sources of potential bias or imprecision. Discuss both direction and magnitude of any potential bias<br><a href="#">Page 10, paragraph 1</a>       |
| Interpretation   | 20 | Give a cautious overall interpretation of results considering objectives, limitations, multiplicity of analyses, results from similar studies, and other relevant evidence<br><a href="#">Pages 9-11</a> |
| Generalisability | 21 | Discuss the generalisability (external validity) of the study results<br><a href="#">Page 11, paragraph 2</a>                                                                                            |

**Other information**

|         |    |                                                                                                  |
|---------|----|--------------------------------------------------------------------------------------------------|
| Funding | 22 | Give the source of funding and the role of the funders for the present study and, if applicable, |
|---------|----|--------------------------------------------------------------------------------------------------|

1  
2 for the original study on which the present article is based

3 See title page  
4

5 \*Give information separately for cases and controls in case-control studies and, if applicable, for exposed and  
6 unexposed groups in cohort and cross-sectional studies.  
7

8  
9 **Note:** An Explanation and Elaboration article discusses each checklist item and gives methodological background and  
10 published examples of transparent reporting. The STROBE checklist is best used in conjunction with this article (freely  
11 available on the Web sites of PLoS Medicine at <http://www.plosmedicine.org/>, Annals of Internal Medicine at  
12 <http://www.annals.org/>, and Epidemiology at <http://www.epidem.com/>). Information on the STROBE Initiative is  
13 available at [www.strobe-statement.org](http://www.strobe-statement.org).  
14  
15  
16  
17  
18  
19  
20  
21  
22  
23  
24  
25  
26  
27  
28  
29  
30  
31  
32  
33  
34  
35  
36  
37  
38  
39  
40  
41  
42  
43  
44  
45  
46  
47  
48  
49  
50  
51  
52  
53  
54  
55  
56  
57  
58  
59  
60

Confidential
